# Supplementary material for: Global distribution of deep-sea natural products shows environmental and phylogenetic undersampling and potential for biodiscovery
Source: Research Square preprint supplement (doi:10.21203/rs.3.rs-6984270/v1), 2025-07-03
Supplement: Supplementary file 1 [file bc8154a32c11ff0743f9268d.pdf]

## Supplementary Material

Table 1. A description of the data categories used in the curation of an interdisciplinary database of chemical novelty and bioactivity in the deep sea by 2024.

| Data Category              | Description                                                                                                                                                                          |
|----------------------------|--------------------------------------------------------------------------------------------------------------------------------------------------------------------------------------|
| Domain                     | Taxonomic Domain identified by the publication and defined by WoRMs <sup>89</sup> if available.                                                                                      |
| Kingdom                    | Taxonomic Kingdom identified by the publication defined by WoRMs <sup>89</sup> if available.                                                                                         |
| Phylum                     | Taxonomic Phylum identified by the publication defined by WoRMs <sup>89</sup> if available.                                                                                          |
| Class                      | Taxonomic Class identified by the publication defined by WoRMs <sup>89</sup> if available.                                                                                           |
| Order                      | Taxonomic Order identified by the publication defined by WoRMs <sup>89</sup> if available.                                                                                           |
| Family                     | Taxonomic Family identified by the publication defined by WoRMs <sup>89</sup> if available.                                                                                          |
| Genus                      | Taxonomic Genus identified by the publication defined by WoRMs <sup>89</sup> if available.                                                                                           |
| Species                    | Taxonomic Species identified by the publication defined by WoRMs <sup>89</sup> if available.                                                                                         |
| Strain ID/Accession number | The unique identifier assigned to the specific strain or sequence of the recorded organism, if available.                                                                            |
| Database code              | The code used by the database the original record was derived from, if available.                                                                                                    |
| Compound name              | The chemical name given to the compound in the publication, if available.                                                                                                            |
| SMILES                     | The Simplified Molecular Input Line Entry System (SMILES) line notation that represents chemical structures using short ASCII strings, if available.                                 |
| Pathway                    | Chemical pathway defines by ClassiFire <sup>88</sup> if available.                                                                                                                   |
| Superclass                 | Chemical superclass defines by ClassiFire <sup>88</sup> if available.                                                                                                                |
| Class                      | Chemical class defines by ClassiFire <sup>88</sup> if available.                                                                                                                     |
| Bioactivity                | General bioactivity type and detailed bioactivity results including the IC50 or MIC values where possible.                                                                           |
| Location                   | General descriptive location.                                                                                                                                                        |
| Latitude                   | Latitude in decimal degrees if available.                                                                                                                                            |
| Longitude                  | Longitude in decimal degrees if available.                                                                                                                                           |
| Depth (m)                  | Depth of sample collection in meters if available.                                                                                                                                   |
| DOI                        | The Digital Object Identifier (DOI) of the publication from which the record was derived.                                                                                            |
| Chemical Novelty           | If the compound was deemed chemically novel (N) or not (-) at the time of publication.                                                                                               |
| Additional information     | Any additional information, for example other DOIs that have recorded the compound previously.                                                                                       |
| Environment                | A description of if the sample was collected from the pelagic or benthos, and any details of the habitat or geomorphological feature from which the sample was derived if available. |
| WoRMS                      | If the recorded taxonomic classification is (Y) or is not (N) featured in the WoRMS catalogue <sup>89</sup> .                                                                        |

Table 2. A summary of the curated interdisciplinary database that describes the abundance, distribution, chemistry, taxonomy, phylogeny, and environment of chemical novelty and bioactivity in the deep sea by 2024.

| Data Collection                                                                                                                                                 | Count | Description                                                                                                                                                                                                                                                                                                          |
|-----------------------------------------------------------------------------------------------------------------------------------------------------------------|-------|----------------------------------------------------------------------------------------------------------------------------------------------------------------------------------------------------------------------------------------------------------------------------------------------------------------------|
| Total Data Entries                                                                                                                                              | 2 907 | A database of all deep-sea bioactivity and chemical novelty records (compounds and extracts).                                                                                                                                                                                                                        |
| Novel Compounds                                                                                                                                                 | 2 195 | Recorded as “novel” or “new” at the time of publication (77 % of compounds recorded).                                                                                                                                                                                                                                |
| Bioactive Compounds                                                                                                                                             | 1 870 | Compounds that have shown any form of bioactivity (65 % of records).                                                                                                                                                                                                                                                 |
| Bioactive Extracts                                                                                                                                              | 30    | Compounds are not defined.                                                                                                                                                                                                                                                                                           |
| <b>Chemistry</b>                                                                                                                                                |       |                                                                                                                                                                                                                                                                                                                      |
| Chemical Compounds                                                                                                                                              | 2 877 | Entries defining chemical compounds, extracts excluded.                                                                                                                                                                                                                                                              |
| Chemical Compound Classes                                                                                                                                       | 216   | 445 compounds could not be defined to a class using the NP classifier platform <sup>88</sup> and open access literature.                                                                                                                                                                                             |
| Chemical Compound Super Classes                                                                                                                                 | 67    | 337 compounds could not be defined to a superclass using the NP classifier platform <sup>88</sup> and open access literature.                                                                                                                                                                                        |
| Chemical Compound Structure Pathways                                                                                                                            | 8     | Alkaloids (474), Amino acids and peptides (259), Carbohydrates (12), Cyanocobalamin (1), Fatty acids (148), Polyketides (903), Shikimates and phenylpropanoids (131) Terpenoids (733).<br>180 compounds could not be defined to a pathway using the NP classifier platform <sup>88</sup> and open access literature. |
| <b>Bioactivity</b> *single compounds/extracts may exhibit multiple activities; thus 1900 bioactive compounds/extracts generate 2290 recorded bioactive results. |       |                                                                                                                                                                                                                                                                                                                      |
| Antibacterial Compounds                                                                                                                                         | 504   |                                                                                                                                                                                                                                                                                                                      |
| Antiviral Compounds                                                                                                                                             | 98    |                                                                                                                                                                                                                                                                                                                      |
| Antifungal Compounds                                                                                                                                            | 136   |                                                                                                                                                                                                                                                                                                                      |
| Cytotoxic Compounds                                                                                                                                             | 849   |                                                                                                                                                                                                                                                                                                                      |
| Anti-inflammatory Compounds                                                                                                                                     | 205   |                                                                                                                                                                                                                                                                                                                      |
| Antioxidant Compounds                                                                                                                                           | 88    |                                                                                                                                                                                                                                                                                                                      |
| Enzyme activity                                                                                                                                                 | 175   |                                                                                                                                                                                                                                                                                                                      |
| Antiparasitic Compounds                                                                                                                                         | 34    |                                                                                                                                                                                                                                                                                                                      |
| Other Bioactivity                                                                                                                                               | 201   |                                                                                                                                                                                                                                                                                                                      |
| <b>Taxonomy</b>                                                                                                                                                 |       |                                                                                                                                                                                                                                                                                                                      |
| Kingdoms                                                                                                                                                        | 4     | Animalia, Bacteria, Chromista, Fungi. 10 records identified to kingdom only.                                                                                                                                                                                                                                         |
| Phyla                                                                                                                                                           | 16    | Actinobacteria, Aquificae, Arthropoda, Firmicutes, Proteobacteria, Chordata, Cnidaria, Echinodermata, Mollusca, Nematoda, Porifera, Foraminifera, Ochrophyta, Ascomycota, Basidiomycota, Zygomycota. 9 records identified to phyla only.                                                                             |
| Classes                                                                                                                                                         | 32    | 2 records identified to class only.                                                                                                                                                                                                                                                                                  |

|                   |     |                                                                                                                                                                                |
|-------------------|-----|--------------------------------------------------------------------------------------------------------------------------------------------------------------------------------|
| Orders            | 69  | 1 record identified to order only.                                                                                                                                             |
| Families          | 142 | 14 records identified to family only.                                                                                                                                          |
| Genera            | 192 | 1 161 records identified to genus only (40 %).                                                                                                                                 |
| Species           | 223 | 1 710 records identified to species level (59 %).                                                                                                                              |
| <b>Literature</b> |     |                                                                                                                                                                                |
| Databases         | 7   | MarinLit <sup>4</sup> , CMNPD <sup>74</sup> , WoRMS <sup>89</sup> , NP Classifier <sup>88</sup> , Reaxys <sup>86</sup> , Chem Spider <sup>87</sup> , Time Tree <sup>90</sup> . |
